# Supplementary material for: Targeted NGS-Based Analysis of Pneumocystis jirovecii Reveals Novel Genotypes
Source: MDPI journal article supplement (doi:10.3390/jof8080863), 2022-08-17
Supplement: s1 [file s1]

**Supplemental Table S1: Demographics table of samples analyzed in this study**

| <b>Sample ID</b> | <b>Origin</b> | <b>Age</b> | <b>Sex</b> | <b>HIV status</b> |
|------------------|---------------|------------|------------|-------------------|
| B1               | Bangladesh    | 4 months   | Male       | Negative          |
| B2               | Bangladesh    | 20 months  | Male       | Negative          |
| B3               | Bangladesh    | 4 months   | Male       | Negative          |
| B4               | Bangladesh    | 3 months   | Female     | Negative          |
| B5               | Bangladesh    | 8 months   | Male       | Negative          |
| M1               | Mali          | 4 months   | Female     | Negative          |
| M2               | Mali          | 2 months   | Male       | Negative          |
| M3               | Mali          | 5 months   | Male       | Unknown           |
| M4               | Mali          | 4 months   | Male       | Unknown           |
| M5               | Mali          | 3 months   | Male       | Positive          |
| M6               | Mali          | 5 months   | Male       | Unknown           |
| T1               | Thailand      | 4 months   | Male       | Negative          |
| T2               | Thailand      | 3 months   | Male       | Negative          |
| T3               | Thailand      | 2 months   | Female     | Negative          |
| T4               | Thailand      | 3 months   | Female     | Negative          |
| T5               | Thailand      | 2 months   | Female     | Negative          |
| T6               | Thailand      | 2 months   | Female     | Negative          |
| Z1               | Zambia        | 2 months   | Male       | Negative          |
| Z2               | Zambia        | 3 months   | Male       | Positive          |
| Z3               | Zambia        | 3 months   | Female     | Negative          |
| Z4               | Zambia        | 2 months   | Male       | Negative          |
| Z5               | Zambia        | 2 months   | Female     | Negative          |
| Z6               | Zambia        | 3 months   | Female     | Positive          |
| C1               | Canada        | 37 years   | Male       | Unknown           |
| C2               | Canada        | 30 years   | Female     | Unknown           |
| C3               | Canada        | 49 years   | Male       | Unknown           |
| C4               | Canada        | 37 years   | Male       | Unknown           |
| C5               | Canada        | 46 years   | Male       | Unknown           |
| C6               | Canada        | 83 years   | Female     | Unknown           |
| C7               | Canada        | 54 years   | Male       | Unknown           |
| C8               | Canada        | 63 years   | Female     | Unknown           |
| C9               | Canada        | 79 years   | Male       | Unknown           |
| C10              | Canada        | 75 years   | Male       | Unknown           |
| C11              | Canada        | 52 years   | Female     | Unknown           |
| U1               | United States | 32 years   | Male       | Positive          |
| U2               | United States | 31 years   | Male       | Positive          |

|                                        | B1      | B2            | B3      | B4      | B5      | M1      | M2      | M3      | M4      | M5       | M6      | T1      | T2      | T3      | T4      | T5      | T6      | Z1      | Z2      | Z3      | Z4      | Z5      | Z6      | C1       | C2      | C3      | C4      | C5      | C6      | C7      | C8      | C9       | C10     | C11     | U1      | U2      |       |
|----------------------------------------|---------|---------------|---------|---------|---------|---------|---------|---------|---------|----------|---------|---------|---------|---------|---------|---------|---------|---------|---------|---------|---------|---------|---------|----------|---------|---------|---------|---------|---------|---------|---------|----------|---------|---------|---------|---------|-------|
| T551_01756                             | 31787   | 319           | 31244   | 4465    | 16329   | 17239   | 23112   | 55      | 0       | 332823   | 41427   | 0       | 16758   | 16142   | 1234    | 38681   | 2902    | 81223   | 9909    | 28443   | 13688   | 32176   | 47647   | 0        | 11961   | 1       | 1       | 0       | 0       | 0       | 0       | 0        | 0       | 0       | 1       | 0       | 13630 |
| T551_03199                             | 14925   | 318           | 18972   | 6938    | 50463   | 45221   | 42314   | 40      | 4845    | 370929   | 44115   | 1       | 28949   | 39042   | 4463    | 34496   | 9085    | 73479   | 24537   | 60282   | 6063    | 106478  | 65966   | 0        | 15596   | 1       | 0       | 100     | 0       | 213     | 127     | 0        | 0       | 0       | 0       | 1       | 21081 |
| T551_01755                             | 11789   | 0             | 18657   | 4041    | 13319   | 18444   | 20889   | 0       | 1       | 20949    | 26592   | 1       | 13816   | 8452    | 4144    | 20031   | 4693    | 24150   | 13696   | 23374   | 11934   | 27696   | 32668   | 0        | 6424    | 0       | 0       | 47      | 163     | 231     | 0       | 0        | 0       | 0       | 0       | 11399   |       |
| T551_01830                             | 11530   | 100           | 25905   | 0       | 31321   | 13840   | 27887   | 4167    | 178     | 319161   | 29970   | 0       | 5447    | 31472   | 3450    | 12683   | 11349   | 51194   | 14658   | 38364   | 18591   | 71015   | 49941   | 0        | 12034   | 1       | 0       | 140     | 0       | 2       | 67      | 0        | 0       | 1       | 0       | 13662   |       |
| T551_00896                             | 10343   | 0             | 21829   | 8021    | 19270   | 19390   | 15621   | 0       | 0       | 127925   | 23206   | 0       | 5060    | 3941    | 249     | 16602   | 9292    | 18676   | 5750    | 28540   | 1492    | 34753   | 35698   | 0        | 7170    | 0       | 0       | 31      | 38      | 1       | 0       | 0        | 0       | 0       | 0       | 6821    |       |
| T551_02309                             | 9479    | 0             | 7616    | 1605    | 9055    | 15385   | 15646   | 12      | 0       | 183011   | 19175   | 0       | 8828    | 3691    | 1068    | 26642   | 0       | 25501   | 26599   | 24112   | 1304    | 24402   | 30483   | 0        | 5499    | 2       | 0       | 79      | 422     | 0       | 0       | 0        | 0       | 0       | 0       | 8006    |       |
| T551_03038                             | 9188    | 9011          | 23489   | 0       | 11103   | 17869   | 16725   | 19      | 0       | 194261   | 19106   | 0       | 14403   | 17334   | 2738    | 19405   | 16614   | 1923    | 14177   | 28704   | 4965    | 41130   | 30727   | 0        | 13486   | 0       | 0       | 41      | 1       | 106     | 245     | 0        | 0       | 0       | 0       | 12063   |       |
| T551_03158                             | 9074    | 28            | 9988    | 1       | 4158    | 12606   | 10227   | 31      | 130     | 109170   | 12585   | 0       | 8177    | 7948    | 1146    | 5712    | 7646    | 11383   | 7411    | 15592   | 12537   | 30574   | 15070   | 0        | 8224    | 0       | 0       | 77      | 0       | 0       | 156     | 0        | 0       | 0       | 0       | 3820    |       |
| T551_02850                             | 8736    | 219           | 12150   | 11239   | 4775    | 19728   | 14265   | 0       | 251     | 173131   | 18552   | 0       | 1697    | 10276   | 1997    | 10932   | 10340   | 28899   | 7934    | 19392   | 0       | 50415   | 32837   | 0        | 7792    | 0       | 0       | 86      | 31      | 0       | 135     | 0        | 1       | 0       | 1       | 9810    |       |
| T551_02533                             | 1205    | 0             | 11219   | 0       | 0       | 34      | 67      | 0       | 0       | 219      | 0       | 0       | 0       | 2688    | 350     | 0       | 0       | 0       | 449     | 53      | 0       | 0       | 0       | 0        | 0       | 0       | 0       | 0       | 0       | 0       | 0       | 0        | 0       | 0       | 0       | 0       |       |
| T551_00303                             | 13      | 0             | 23      | 14177   | 13422   | 29125   | 19165   | 0       | 0       | 245      | 313     | 2       | 27      | 32767   | 7241    | 20901   | 8594    | 32767   | 4721    | 28110   | 7998    | 16308   | 32767   | 0        | 8619    | 0       | 1812    | 0       | 36      | 49      | 60      | 0        | 0       | 1       | 1       | 11796   |       |
| cox3                                   | 12615   | 818           | 166339  | 62666   | 135213  | 117319  | 194772  | 4992    | 12165   | 169478   | 192564  | 24579   | 93385   | 115519  | 90900   | 161918  | 58162   | 163826  | 135441  | 128871  | 119885  | 188959  | 106138  | 30       | 118674  | 5       | 4       | 1088    | 1348    | 913     | 1239    | 4        | 17      | 7       | 65      | 169129  |       |
| nad4L_nad5                             | 109398  | 161           | 135051  | 34919   | 132839  | 132318  | 111127  | 7482    | 247     | 202826   | 186537  | 11820   | 53354   | 110750  | 36357   | 125134  | 48454   | 147384  | 88792   | 124935  | 37670   | 195743  | 151293  | 1        | 105429  | 0       | 2       | 59      | 128     | 211     | 1       | 1        | 4       | 2       | 12      | 186280  |       |
| atp6                                   | 130715  | 2092          | 130828  | 101372  | 141781  | 133551  | 104943  | 3965    | 2239    | 105901   | 117853  | 17322   | 84423   | 71085   | 15323   | 102395  | 43240   | 167940  | 160582  | 157239  | 85371   | 190853  | 153273  | 39       | 115946  | 1       | 0       | 1975    | 1914    | 1458    | 2420    | 11       | 4       | 12      | 34      | 134575  |       |
| nad1                                   | 110988  | 406           | 127148  | 52329   | 135555  | 134964  | 118818  | 6248    | 22500   | 115665   | 163899  | 19916   | 103487  | 97697   | 33395   | 151839  | 34334   | 124098  | 156777  | 180558  | 108078  | 135898  | 170342  | 15       | 1172051 | 0       | 1061    | 248     | 499     | 248     | 661     | 4        | 14      | 7       | 16      | 172051  |       |
| nad4                                   | 105060  | 7219          | 107261  | 52561   | 126096  | 116330  | 136531  | 7532    | 15393   | 151548   | 114494  | 16993   | 70160   | 78660   | 16154   | 132678  | 39400   | 126061  | 106044  | 133107  | 64515   | 195234  | 132092  | 2        | 112920  | 2       | 2       | 1353    | 1022    | 1350    | 1565    | 6        | 2       | 5       | 1       | 112534  |       |
| nad6                                   | 69172   | 4179          | 99883   | 67084   | 94039   | 93870   | 140791  | 1865    | 9461    | 190424   | 152486  | 11473   | 63620   | 30159   | 5320    | 118188  | 20296   | 164514  | 92450   | 121304  | 59600   | 156123  | 122658  | 59       | 69421   | 2       | 1246    | 12      | 329     | 100     | 518     | 227      | 3       | 0       | 4       | 108602  |       |
| atp9                                   | 70988   | 300           | 99570   | 26406   | 87079   | 99021   | 125425  | 4396    | 9359    | 114962   | 168611  | 4774    | 40453   | 90567   | 24224   | 113375  | 15828   | 155157  | 96649   | 140676  | 53286   | 121324  | 155251  | 3        | 83656   | 0       | 1717    | 171     | 242     | 610     | 271     | 6        | 8       | 4       | 2       | 185204  |       |
| cox1/atp8                              | 86793   | 141           | 110662  | 5267    | 62014   | 81784   | 150430  | 3742    | 291     | 50906    | 39395   | 21305   | 39769   | 139158  | 55771   | 143044  | 68765   | 204762  | 103504  | 144488  | 94606   | 203633  | 204684  | 3        | 167498  | 2       | 0       | 185     | 57      | 93      | 224     | 5        | 6       | 5       | 1       | 204793  |       |
| % Targets Detected                     | 100     | 76.1905       | 100     | 85.7143 | 95.2381 | 100     | 100     | 76.1905 | 66.6667 | 100      | 95.2381 | 47.619  | 95.2381 | 100     | 100     | 95.2381 | 90.4762 | 95.2381 | 100     | 100     | 90.4762 | 95.2381 | 95.2381 | 47.61905 | 95.2381 | 47.619  | 42.8571 | 85.7143 | 76.1905 | 76.1905 | 76.1905 | 47.61905 | 52.381  | 57.1429 | 61.9048 | 95.2381 |       |
| Total NGS reads PF                     | 1097805 | 49651         | 1376319 | 539705  | 1244970 | 1288330 | 1706880 | 136621  | 158128  | 14836258 | 2639597 | 170750  | 833845  | 1220972 | 357957  | 1938779 | 408267  | 3149636 | 1164145 | 1965546 | 733735  | 2165462 | 2182122 | 4170     | 1135068 | 5238    | 37244   | 20784   | 11108   | 18687   | 20830   | 66969    | 70683   | 51202   | 51196   | 2421223 |       |
| Total Mapped Reads to P. jiroveci      | 927678  | 25311         | 1157834 | 453091  | 1087831 | 1112596 | 1286745 | 44545   | 77069   | 3122534  | 1370880 | 124186  | 651813  | 907348  | 305524  | 1254654 | 405994  | 1602957 | 1070380 | 1428144 | 701583  | 1822714 | 1569535 | 152      | 987371  | 17      | 5845    | 5692    | 6230    | 5585    | 7689    | 264      | 59      | 45      | 138     | 1385126 |       |
| Total Pneumocystis Genome Reads        | 118049  | 9995          | 181092  | 50487   | 173215  | 203421  | 205908  | 4324    | 5405    | 2020824  | 235041  | 4       | 103162  | 173753  | 28080   | 208085  | 80515   | 349195  | 129841  | 294966  | 78572   | 434947  | 373804  | 0        | 96675   | 5       | 1813    | 601     | 691     | 602     | 790     | 0        | 1       | 3       | 3       | 111968  |       |
| Total Pneumocystis Mitochondrial Reads | 809629  | 15316         | 976742  | 402604  | 914616  | 909177  | 1082837 | 40222   | 71664   | 1101710  | 1135839 | 124182  | 548651  | 733595  | 277444  | 1048569 | 325479  | 1253762 | 940239  | 1131178 | 623011  | 1387767 | 1195731 | 152      | 890696  | 12      | 4032    | 5091    | 5539    | 4983    | 6899    | 264      | 58      | 42      | 135     | 1273158 |       |
| % reads mapped to P. jiroveci          | 84.5030 | 50.9778       | 84.1254 | 83.9516 | 87.3781 | 86.3597 | 75.5030 | 32.6055 | 48.7384 | 21.0466  | 51.9352 | 72.7297 | 78.1696 | 74.3136 | 85.3522 | 64.7136 | 86.6977 | 50.8902 | 91.9198 | 72.5571 | 95.6180 | 84.1721 | 71.9270 | 3.6451   | 86.9878 | 0.3246  | 15.6938 | 27.3865 | 56.0857 | 29.8871 | 36.9131 | 0.3942   | 0.0835  | 0.0879  | 0.2696  | 57.2077 |       |
| % mapped Mitochondrial Reads           | 87.2748 | 60.5112       | 84.3594 | 88.8572 | 84.0770 | 81.7166 | 84.0226 | 90.2932 | 92.9868 | 35.2826  | 82.8547 | 99.9968 | 84.1731 | 80.8505 | 90.8092 | 83.5744 | 80.1684 | 78.2156 | 87.8662 | 79.3172 | 88.8008 | 76.1374 | 76.1838 | 100.0000 | 90.2088 | 70.5882 | 68.9820 | 89.4413 | 88.9085 | 89.2211 | 89.7256 | 100.0000 | 98.3051 | 93.3333 | 97.8261 | 91.9164 |       |
| % mapped Whole Genome Reads            | 12.7252 | 39.4888       | 15.6406 | 11.1428 | 15.9230 | 18.2834 | 15.9774 | 9.7068  | 7.0132  | 64.7174  | 17.1453 | 0.0032  | 15.6269 | 19.1495 | 9.1908  | 16.4256 | 19.8316 | 21.7844 | 12.1336 | 20.6826 | 11.1992 | 23.8626 | 23.8162 | 0.0000   | 9.7912  | 29.4118 | 31.0180 | 10.5887 | 11.0915 | 10.7789 | 10.2744 | 0.0000   | 1.6949  | 6.6667  | 2.1739  | 8.0836  |       |
| Sample ID Legend                       |         |               |         |         |         |         |         |         |         |          |         |         |         |         |         |         |         |         |         |         |         |         |         |          |         |         |         |         |         |         |         |          |         |         |         |         |       |
| Sample ID                              |         | Origin        |         |         |         |         |         |         |         |          |         |         |         |         |         |         |         |         |         |         |         |         |         |          |         |         |         |         |         |         |         |          |         |         |         |         |       |
| B1-B5                                  |         | Bangladesh    |         |         |         |         |         |         |         |          |         |         |         |         |         |         |         |         |         |         |         |         |         |          |         |         |         |         |         |         |         |          |         |         |         |         |       |
| M1-M6                                  |         | Mali          |         |         |         |         |         |         |         |          |         |         |         |         |         |         |         |         |         |         |         |         |         |          |         |         |         |         |         |         |         |          |         |         |         |         |       |
| T1-T6                                  |         | Thailand      |         |         |         |         |         |         |         |          |         |         |         |         |         |         |         |         |         |         |         |         |         |          |         |         |         |         |         |         |         |          |         |         |         |         |       |
| Z1-Z6                                  |         | Zambia        |         |         |         |         |         |         |         |          |         |         |         |         |         |         |         |         |         |         |         |         |         |          |         |         |         |         |         |         |         |          |         |         |         |         |       |
| C1-C11                                 |         | Canada        |         |         |         |         |         |         |         |          |         |         |         |         |         |         |         |         |         |         |         |         |         |          |         |         |         |         |         |         |         |          |         |         |         |         |       |
| U1-U2                                  |         | United States |         |         |         |         |         |         |         |          |         |         |         |         |         |         |         |         |         |         |         |         |         |          |         |         |         |         |         |         |         |          |         |         |         |         |       |

Supplemental Table S2. NGS read metrics of mapped reads to each fungal target. Values in red indicate mapped read values that exceeded the read threshold in the software.

| Ref ID         | Ref Pos | Gene Name  | Transcript ID  | Murina Ortholog                              | B1  | B2  | B3 | B4 | B5 | M1  | M2  | M3 | M4 | M5 | M6  | T1  | T2  | T3 | T4  | T5 | T6  | Z1 | Z2 | Z3 | Z4 | Z5 | Z6  | C1  | C2 | C3 | C4 | C5  | C6    | C7  | C8 | C9 | C10 | C11 | U1 | U2 | Sample ID |   |            |     |
|----------------|---------|------------|----------------|----------------------------------------------|-----|-----|----|----|----|-----|-----|----|----|----|-----|-----|-----|----|-----|----|-----|----|----|----|----|----|-----|-----|----|----|----|-----|-------|-----|----|----|-----|-----|----|----|-----------|---|------------|-----|
|                |         |            |                |                                              | 4*  | 20* | 4* | 3* | 8* | 4*  | 2*  | 5* | 4* | 3* | 5*  | 4*  | 3*  | 2* | 3*  | 2* | 2*  | 2* | 3* | 3* | 2* | 2* | 3*  | 37  | 30 | 49 | 37 | 46  | 83    | 54  | 63 | 79 | 75  | 52  | 32 | 31 | Age       |   |            |     |
|                |         |            |                |                                              | M   | M   | M  | F  | M  | F   | M   | M  | M  | M  | M   | M   | M   | M  | M   | M  | F   | F  | F  | F  | M  | M  | F   | M   | F  | M  | F  | M   | F     | M   | M  | F  | M   | F   | M  | M  | F         | M | M          | Sex |
| NW_017264775.1 | 588078  | T551_00303 | XM_018372570.1 | GTP binding                                  | -   | -   | -  | -  | -  | -   | -   | x  | x  | +  | x   | -   | -   | -  | -   | -  | -   | -  | -  | +  | -  | -  | -   | +   | x  | x  | x  | x   | x     | A>C | x  | x  | x   | x   | x  | x  | +         | + | HIV Status |     |
| NW_017264775.1 | 588101  | T551_00303 |                | GTP binding                                  |     |     |    |    |    |     |     |    |    |    |     |     |     |    |     |    |     |    |    |    |    |    |     |     |    |    |    |     |       |     |    |    |     |     |    |    |           |   |            |     |
| NW_017264775.1 | 588109  | T551_00303 |                | GTP binding                                  |     |     |    |    |    |     |     |    |    |    |     |     |     |    |     |    |     |    |    |    |    |    |     |     |    |    |    |     |       |     |    |    |     |     |    |    |           |   |            |     |
| NW_017264775.1 | 588138  | T551_00303 | XM_018372570.1 | GTP binding                                  |     |     |    |    |    |     |     |    |    |    |     |     |     |    |     |    |     |    |    |    |    |    |     |     |    |    |    |     |       |     |    |    |     |     |    |    |           |   |            |     |
| NW_017264785.1 | 194152  | T551_02533 | XM_018374796.1 | Meu10                                        | C>T |     |    |    |    | C>T | C>T |    |    |    | C>T |     |     |    |     |    |     |    |    |    |    |    | C>T | C>T |    |    |    |     |       |     |    |    |     |     |    |    |           |   |            |     |
| NW_017264785.1 | 194184  | T551_02533 | XM_018374796.1 | Meu10                                        | G>A |     |    |    |    | G>A | G>A |    |    |    | G>A |     |     |    |     |    |     |    |    |    |    |    | G>A | G>A |    |    |    |     |       |     |    |    |     |     |    |    |           |   |            |     |
| NW_017264788.1 | 37245   |            |                |                                              |     |     |    |    |    |     |     |    |    |    |     |     |     |    |     |    | G>T |    |    |    |    |    |     |     |    |    |    |     |       |     |    |    |     |     |    |    |           |   |            |     |
| NW_017264788.1 | 37256   |            |                |                                              |     |     |    |    |    |     |     |    |    |    |     |     |     |    |     |    | A>T |    |    |    |    |    |     |     |    |    |    |     |       |     |    |    |     |     |    |    |           |   |            |     |
| NW_017264788.1 | 183203  | T551_03038 | XM_018375301.1 | meiotically up-regulated gene 117 protein *C | G>A |     |    |    |    |     |     |    |    |    |     |     |     |    |     |    |     |    |    |    |    |    |     |     |    |    |    |     |       |     |    |    |     |     |    |    |           |   |            |     |
| NW_017264789.1 | 101701  | T551_03158 | XM_018375421.1 | DNAJ                                         |     |     |    |    |    |     |     |    |    |    |     |     |     |    |     |    |     |    |    |    |    |    |     |     |    |    |    | G>A |       |     |    |    |     |     |    |    |           |   |            |     |
| NW_017264789.1 | 195132  | T551_03199 | XM_018375462.1 | Arp9                                         | A>G |     |    |    |    |     |     |    |    |    |     | A>G | A>G |    | A>G |    |     |    |    |    |    |    |     |     |    |    |    |     |       |     |    |    |     |     |    |    |           |   |            |     |
| NW_017264776.1 | 609401  | T551_05004 |                |                                              |     |     |    |    |    |     |     |    |    |    |     |     |     |    |     |    |     |    |    |    |    |    |     |     |    |    |    |     |       |     |    |    |     |     |    |    |           |   |            |     |
| NW_017264776.1 | 610345  | T551_05004 |                |                                              |     |     |    |    |    |     |     |    |    |    |     |     |     |    |     |    |     |    |    |    |    |    |     |     |    |    |    |     |       |     |    |    |     |     |    |    |           |   |            |     |
| NW_017264776.1 | 610355  | T551_05004 |                |                                              |     |     |    |    |    |     |     |    |    |    |     |     |     |    |     |    |     |    |    |    |    |    |     |     |    |    |    |     |       |     |    |    |     |     |    |    |           |   |            |     |
| NW_017264776.1 | 610377  | T551_05004 |                |                                              |     |     |    |    |    |     |     |    |    |    |     |     |     |    |     |    |     |    |    |    |    |    |     |     |    |    |    |     |       |     |    |    |     |     |    |    |           |   |            |     |
| NW_017264776.1 | 610382  | T551_05004 |                |                                              |     |     |    |    |    |     |     |    |    |    |     |     |     |    |     |    |     |    |    |    |    |    |     |     |    |    |    |     |       |     |    |    |     |     |    |    |           |   |            |     |
| NW_017264776.1 | 610873  | T551_05004 |                |                                              |     |     |    |    |    |     |     |    |    |    |     |     |     |    |     |    |     |    |    |    |    |    |     |     |    |    |    |     |       |     |    |    |     |     |    |    |           |   |            |     |
| NW_017264776.1 | 610917  | T551_05004 |                |                                              |     |     |    |    |    |     |     |    |    |    |     |     |     |    |     |    |     |    |    |    |    |    |     |     |    |    |    |     |       |     |    |    |     |     |    |    |           |   |            |     |
| NW_017264776.1 | 610922  | T551_05004 |                |                                              |     |     |    |    |    |     |     |    |    |    |     |     |     |    |     |    |     |    |    |    |    |    |     |     |    |    |    |     |       |     |    |    |     |     |    |    |           |   |            |     |
| NW_017264776.1 | 612454  | T551_05005 |                |                                              |     |     |    |    |    |     |     |    |    |    |     |     |     |    |     |    |     |    |    |    |    |    |     |     |    |    |    |     | C>T   |     |    |    |     |     |    |    |           |   |            |     |
| NW_017264776.1 | 612497  | T551_05005 |                |                                              |     |     |    |    |    |     |     |    |    |    |     |     |     |    |     |    |     |    |    |    |    |    |     |     |    |    |    |     | TG>CT |     |    |    |     |     |    |    |           |   |            |     |
| NW_017264776.1 | 613009  | T551_05005 |                |                                              |     |     |    |    |    |     |     |    |    |    |     |     |     |    |     |    |     |    |    |    |    |    |     |     |    |    |    |     |       |     |    |    |     |     |    |    |           |   |            |     |
| NW_017264776.1 | 613023  | T551_05005 |                |                                              |     |     |    |    |    |     |     |    |    |    |     |     |     |    |     |    |     |    |    |    |    |    |     |     |    |    |    |     |       |     |    |    |     |     |    |    |           |   |            |     |
| NW_017264776.1 | 613025  | T551_05005 |                |                                              |     |     |    |    |    |     |     |    |    |    |     |     |     |    |     |    |     |    |    |    |    |    |     |     |    |    |    |     |       |     |    |    |     |     |    |    |           |   |            |     |
| NW_017264776.1 | 614213  | T551_05005 |                |                                              |     |     |    |    |    |     |     |    |    |    |     |     |     |    |     |    |     |    |    |    |    |    |     |     |    |    |    |     |       |     |    |    |     |     |    |    |           |   |            |     |
| NW_017264776.1 | 614236  | T551_05005 |                |                                              |     |     |    |    |    |     |     |    |    |    |     |     |     |    |     |    |     |    |    |    |    |    |     |     |    |    |    |     |       |     |    |    |     |     |    |    |           |   |            |     |
| NW_017264776.1 | 614241  | T551_05005 |                |                                              |     |     |    |    |    |     |     |    |    |    |     |     |     |    |     |    |     |    |    |    |    |    |     |     |    |    |    |     |       |     |    |    |     |     |    |    |           |   |            |     |
| NW_017264776.1 | 614245  | T551_05005 |                |                                              |     |     |    |    |    |     |     |    |    |    |     |     |     |    |     |    |     |    |    |    |    |    |     |     |    |    |    |     |       |     |    |    |     |     |    |    |           |   |            |     |
| NW_017264776.1 | 614278  | T551_05005 |                |                                              |     |     |    |    |    |     |     |    |    |    |     |     |     |    |     |    |     |    |    |    |    |    |     |     |    |    |    |     |       |     |    |    |     |     |    |    |           |   |            |     |
| NW_017264776.1 | 614321  | T551_05005 |                |                                              |     |     |    |    |    |     |     |    |    |    |     |     |     |    |     |    |     |    |    |    |    |    |     |     |    |    |    |     |       |     |    |    |     |     |    |    |           |   |            |     |
| NW_017264776.1 | 614686  | T551_05005 |                |                                              |     |     |    |    |    |     |     |    |    |    |     |     |     |    |     |    |     |    |    |    |    |    |     |     |    |    |    |     |       |     |    |    |     |     |    |    |           |   |            |     |
| NW_017264776.1 | 614722  | T551_05005 |                |                                              |     |     |    |    |    |     |     |    |    |    |     |     |     |    |     |    |     |    |    |    |    |    |     |     |    |    |    |     |       |     |    |    |     |     |    |    |           |   |            |     |
| NW_017264776.1 | 614744  | T551_05005 |                |                                              |     |     |    |    |    |     |     |    |    |    |     |     |     |    |     |    |     |    |    |    |    |    |     |     |    |    |    |     |       |     |    |    |     |     |    |    |           |   |            |     |
| NW_017264776.1 | 614781  | T551_05005 |                |                                              |     |     |    |    |    |     |     |    |    |    |     |     |     |    |     |    |     |    |    |    |    |    |     |     |    |    |    |     |       |     |    |    |     |     |    |    |           |   |            |     |
| NW_017264776.1 | 614883  | T551_05005 |                |                                              |     |     |    |    |    |     |     |    |    |    |     |     |     |    |     |    |     |    |    |    |    |    |     |     |    |    |    |     |       |     |    |    |     |     |    |    |           |   |            |     |
| NW_017264776.1 | 614884  | T551_05005 |                |                                              |     |     |    |    |    |     |     |    |    |    |     |     |     |    |     |    |     |    |    |    |    |    |     |     |    |    |    |     |       |     |    |    |     |     |    |    |           |   |            |     |
| NW_017264776.1 | 614981  | T551_05005 |                |                                              |     |     |    |    |    |     |     |    |    |    |     |     |     |    |     |    |     |    |    |    |    |    |     |     |    |    |    |     |       |     |    |    |     |     |    |    |           |   |            |     |

| Sample ID Legend |               |
|------------------|---------------|
| Sample ID        | Origin        |
| B1-B5            | Bangladesh    |
| M1-M6            | Mali          |
| T1-T6            | Thailand      |
| Z1-Z6            | Zambia        |
| C1-C11           | Canada        |
| U1-U2            | United States |

| Demographics Legend |               |     |        |
|---------------------|---------------|-----|--------|
| Age                 |               | Sex |        |
| *                   |               | M   | Male   |
|                     | age in months | F   | Female |

| HIV Status |              |
|------------|--------------|
| -          | HIV positive |
| +          | HIV negative |
| x          | HIV unknown  |

| SNP Legend |                                                                                                                                                           |
|------------|-----------------------------------------------------------------------------------------------------------------------------------------------------------|
| >          | directionality of the nucleotide change, going from reference sequence (nucleotide to right of symbol) to variant sequence (nucleotide to left of symbol) |
| ins        | insertion of nucleotide                                                                                                                                   |

Supplemental Table S3. Full SNP table of *P. jirovecii* genomic SNPs

| Ref ID      | Ref Pos | Gene Name | B1 | B2  | B3 | B4 | B5       | M1 | M2  | M3 | M4 | M5       | M6   | T1        | T2       | T3       | T4        | T5 | T6 | Z1          | Z2  | Z3  | Z4 | Z5  | Z6        | C1 | C2 | C3 | C4 | C5        | C6 | C7 | C8        | C9 | C10 | C11 | U1 | U2 | Sample ID |            |     |
|-------------|---------|-----------|----|-----|----|----|----------|----|-----|----|----|----------|------|-----------|----------|----------|-----------|----|----|-------------|-----|-----|----|-----|-----------|----|----|----|----|-----------|----|----|-----------|----|-----|-----|----|----|-----------|------------|-----|
|             |         |           | 4' | 20' | 4' | 3' | 8'       | 4' | 2'  | 5' | 4' | 3'       | 5'   | 4'        | 3'       | 2'       | 3'        | 2' | 3' | 2'          | 2'  | 2'  | 3' | 3'  | 2'        | 2' | 3' | 37 | 30 | 49        | 37 | 46 | 83        | 54 | 63  | 79  | 75 | 52 | 32        | 31         | Age |
|             |         |           | M  | M   | M  | F  | M        | F  | M   | M  | M  | M        | M    | M         | M        | M        | M         | F  | F  | F           | F   | M   | M  | F   | M         | F  | F  | M  | F  | M         | M  | M  | F         | M  | F   | M   | M  | F  | M         | M          | Sex |
|             |         |           | -  | -   | -  | -  | -        | -  | -   | x  | x  | +        | x    | -         | -        | -        | -         | -  | -  | -           | -   | +   | -  | -   | -         | +  | x  | x  | x  | x         | x  | x  | x         | x  | x   | x   | x  | +  | +         | HIV Status |     |
| NC 020331.1 | 17794   | cox1      |    |     |    |    |          |    |     |    |    |          |      |           | -> ins C | A        |           |    |    |             |     |     |    |     |           |    |    |    |    |           |    |    |           |    |     |     |    |    |           |            |     |
| NC 020331.1 | 17826   | cox1      |    |     |    |    |          |    |     |    |    |          |      |           |          |          |           |    |    |             |     |     |    |     |           |    |    |    |    |           |    |    |           |    |     |     |    |    |           |            |     |
| NC 020331.1 | 17847   |           |    |     |    |    | C>A      |    |     |    |    | C>A      |      |           |          |          | C>A       |    |    | C>A         | C>A | C>A | C  |     | C>A       |    |    |    |    | A>G       |    |    | A         |    |     |     |    |    | C         |            |     |
| NC 020331.1 | 17850   |           |    |     |    |    | C>T      |    | C>T |    |    | C>T      |      |           |          |          | C>T       |    |    | C>T         | C>T | C>T | C  |     | C>T       |    |    |    |    | C>A       |    |    | C>T       |    |     |     |    |    | C>T       |            |     |
| NC 020331.1 | 17858   |           |    |     |    |    | -> ins T |    |     |    |    | -> ins T |      |           |          |          | -> ins T  |    |    | -> ins Tx4  |     |     |    |     | -> ins T  |    |    |    |    | -> ins T  |    |    | -> ins T  |    |     |     |    |    |           |            |     |
| NC 020331.1 | 17860   |           |    |     |    |    |          |    |     |    |    |          |      | T > del 1 |          |          | T > del 1 |    |    | T > del 1   |     |     | T  |     | T > del 1 |    |    |    |    | T > del 1 |    |    | T > del 1 |    |     |     |    |    |           |            |     |
| NC 020331.1 | 17861   |           |    |     |    |    |          |    |     |    |    |          |      |           |          |          |           |    |    | TTT > del 3 |     |     |    |     |           |    |    |    |    |           |    |    |           |    |     |     |    |    |           |            |     |
| NC 020331.1 | 17864   |           |    |     |    |    | G>T      |    |     |    |    | G>T      |      |           |          |          | G>T       |    |    | G>T         |     |     |    | G>T |           |    |    |    |    |           |    |    |           |    |     |     |    |    |           | G          |     |
| NC 020331.1 | 17928   | atp8      |    |     |    |    | G>T      |    |     |    |    | G>T      |      |           |          |          | G>T       |    |    | G>T         |     |     | G  |     | G>T       |    |    |    |    | G>T       |    |    | G>T       |    |     |     |    |    |           | G>T        |     |
| NC 020331.1 | 18370   | atp6      |    |     |    |    |          |    |     |    |    |          | G>C  |           |          |          |           |    |    |             |     |     |    |     |           |    |    |    |    |           |    |    |           |    |     |     |    |    |           |            |     |
| NC 020331.1 | 18373   | atp6      |    |     |    |    |          |    |     |    |    |          | A>T  |           |          |          |           |    |    |             |     |     |    |     |           |    |    |    |    |           |    |    |           |    |     |     |    |    |           |            |     |
| NC 020331.1 | 19892   | cox3      |    |     |    |    |          |    |     |    |    |          | T>C  |           |          |          |           |    |    |             |     |     |    |     |           |    |    |    |    |           |    |    |           |    |     |     |    |    |           |            |     |
| NC 020331.1 | 19895   | cox3      |    |     |    |    |          |    |     |    |    |          | A>C  |           |          |          |           |    |    |             |     |     |    |     |           |    |    |    |    |           |    |    |           |    |     |     |    |    |           |            |     |
| NC 020331.1 | 19897   | cox3      |    |     |    |    |          |    |     |    |    |          | T>G  |           |          |          |           |    |    |             |     |     |    |     |           |    |    |    |    |           |    |    |           |    |     |     |    |    |           |            |     |
| NC 020331.1 | 19899   | cox3      |    |     |    |    |          |    |     |    |    |          | G>T  |           |          |          |           |    |    |             |     |     |    |     |           |    |    |    |    |           |    |    |           |    |     |     |    |    |           |            |     |
| NC 020331.1 | 19910   | cox3      |    |     |    |    |          |    |     |    |    |          | cox3 |           |          |          |           |    |    |             |     |     |    |     |           |    |    |    |    |           |    |    |           |    |     |     |    |    |           |            |     |
| NC 020331.1 | 19949   | cox3      |    |     |    |    |          |    |     |    |    |          |      |           |          |          |           |    |    |             |     |     |    |     | -> ins A  |    |    |    |    |           |    |    |           |    |     |     |    |    |           |            |     |
| NC 020331.1 | 20254   | atp9      |    |     |    |    |          |    |     |    |    |          |      |           |          |          |           |    |    |             |     |     |    |     |           |    |    |    |    |           |    |    |           |    |     |     |    |    |           |            |     |
| NC 020331.1 | 20259   | atp9      |    |     |    |    | -> ins A | T  |     |    |    | -> ins A |      |           |          |          |           |    |    |             |     |     |    |     |           |    |    |    |    |           |    |    |           |    |     |     |    |    |           |            |     |
| NC 020331.1 | 20361   | atp9      |    |     |    |    |          |    |     |    |    |          | T>C  |           |          |          |           |    |    |             |     |     |    |     |           |    |    |    |    |           |    |    |           |    |     |     |    |    |           |            |     |
| NC 020331.1 | 20676   | nad4L     |    |     |    |    |          |    |     |    |    |          |      |           | -> ins G |          |           |    |    |             |     |     |    |     |           |    |    |    |    |           |    |    |           |    |     |     |    |    |           |            |     |
| NC 020331.1 | 20682   | nad4L     |    |     |    |    |          |    |     |    |    |          |      |           |          |          |           |    |    |             |     |     |    |     |           |    |    |    |    |           |    |    |           |    |     |     |    |    |           |            |     |
| NC 020331.1 | 20688   | nad4L     |    |     |    |    |          |    |     |    |    |          |      | -> ins T  |          |          |           |    |    |             |     |     |    |     |           |    |    |    |    |           |    |    |           |    |     |     |    |    |           |            |     |
| NC 020331.1 | 20783   | nad4L     |    |     |    |    |          |    |     |    |    |          |      |           |          |          |           |    |    |             |     |     |    |     |           |    |    |    |    |           |    |    |           |    |     |     |    |    |           |            |     |
| NC 020331.1 | 23537   | nad4      |    |     |    |    |          |    |     |    |    |          |      |           |          |          |           |    |    |             |     |     |    |     |           |    |    |    |    |           |    |    |           |    |     |     |    |    |           |            |     |
| NC 020331.1 | 23539   | nad4      |    |     |    |    |          |    |     |    |    |          |      |           |          |          |           |    |    |             |     |     |    |     |           |    |    |    |    |           |    |    |           |    |     |     |    |    |           |            |     |
| NC 020331.1 | 29181   | nad6      |    |     |    |    |          |    |     |    |    |          |      |           | -> ins T | -> ins G |           |    |    |             |     |     |    |     |           |    |    |    |    |           |    |    |           |    |     |     |    |    |           |            |     |
| NC 020331.1 | 29185   | nad6      |    |     |    |    |          |    |     |    |    |          |      |           |          |          |           |    |    |             |     |     |    |     |           |    |    |    |    |           |    |    |           |    |     |     |    |    |           |            |     |
| NC 020331.1 | 29190   | nad6      |    |     |    |    |          |    |     |    |    |          |      |           |          |          |           |    |    |             |     |     |    |     |           |    |    |    |    |           |    |    |           |    |     |     |    |    |           |            |     |
| NC 020331.1 | 29320   | nad6      |    |     |    |    |          |    |     |    |    |          |      |           |          |          |           |    |    |             |     |     |    |     |           |    |    |    |    |           |    |    |           |    |     |     |    |    |           |            |     |
| NC 020331.1 | 30066   | nad1      |    |     |    |    |          |    |     |    |    |          |      | -> ins A  |          |          |           |    |    |             |     |     |    |     |           |    |    |    |    |           |    |    |           |    |     |     |    |    |           |            |     |
| NC 020331.1 | 30069   | nad1      |    |     |    |    |          |    |     |    |    |          |      |           |          |          |           |    |    |             |     |     |    |     |           |    |    |    |    |           |    |    |           |    |     |     |    |    |           |            |     |
| NC 020331.1 | 30077   | nad1      |    |     |    |    |          |    |     |    |    |          |      |           |          |          |           |    |    |             |     |     |    |     |           |    |    |    |    |           |    |    |           |    |     |     |    |    |           |            |     |
| NC 020331.1 |         |           |    |     |    |    |          |    |     |    |    |          |      |           |          |          |           |    |    |             |     |     |    |     |           |    |    |    |    |           |    |    |           |    |     |     |    |    |           |            |     |
| NC 020331.1 |         |           |    |     |    |    |          |    |     |    |    |          |      |           |          |          |           |    |    |             |     |     |    |     |           |    |    |    |    |           |    |    |           |    |     |     |    |    |           |            |     |
| NC 020331.1 |         |           |    |     |    |    |          |    |     |    |    |          |      |           |          |          |           |    |    |             |     |     |    |     |           |    |    |    |    |           |    |    |           |    |     |     |    |    |           |            |     |
| NC 020331.1 |         |           |    |     |    |    |          |    |     |    |    |          |      |           |          |          |           |    |    |             |     |     |    |     |           |    |    |    |    |           |    |    |           |    |     |     |    |    |           |            |     |
| NC 020331.1 |         |           |    |     |    |    |          |    |     |    |    |          |      |           |          |          |           |    |    |             |     |     |    |     |           |    |    |    |    |           |    |    |           |    |     |     |    |    |           |            |     |
| NC 020331.1 |         |           |    |     |    |    |          |    |     |    |    |          |      |           |          |          |           |    |    |             |     |     |    |     |           |    |    |    |    |           |    |    |           |    |     |     |    |    |           |            |     |
| NC 020331.1 |         |           |    |     |    |    |          |    |     |    |    |          |      |           |          |          |           |    |    |             |     |     |    |     |           |    |    |    |    |           |    |    |           |    |     |     |    |    |           |            |     |
| NC 020331.1 |         |           |    |     |    |    |          |    |     |    |    |          |      |           |          |          |           |    |    |             |     |     |    |     |           |    |    |    |    |           |    |    |           |    |     |     |    |    |           |            |     |
| NC 020331.1 |         |           |    |     |    |    |          |    |     |    |    |          |      |           |          |          |           |    |    |             |     |     |    |     |           |    |    |    |    |           |    |    |           |    |     |     |    |    | </        |            |     |

| Sample ID Legend |               |
|------------------|---------------|
| Sample ID        | Origin        |
| B1-B5            | Bangladesh    |
| M1-M6            | Mali          |
| T1-T6            | Thailand      |
| Z1-Z6            | Zambia        |
| C1-C11           | Canada        |
| U1-U2            | United States |

| Demographics Legend |               |     |        |
|---------------------|---------------|-----|--------|
| Age                 |               | Sex |        |
| *                   | age in months | M   | Male   |
|                     |               | F   | Female |

| HIV Status |              |
|------------|--------------|
| -          | HIV positive |
| +          | HIV negative |
| x          | HIV unknown  |

| SNP Legend |                                                                                                                                                           |
|------------|-----------------------------------------------------------------------------------------------------------------------------------------------------------|
| >          | directionality of the nucleotide change, going from reference sequence (nucleotide to right of symbol) to variant sequence (nucleotide to left of symbol) |
| ins        | insertion of nucleotide                                                                                                                                   |
| del        | deletion of nucleotide                                                                                                                                    |

Supplemental Table S4. Full SNP table of *P. jirovecii* mitochondrial SNPs
